# Supplementary material for: Identification of Targetable Kinases in Idiopathic Pulmonary Fibrosis
Source: Research Square preprint supplement (doi:10.21203/rs.3.rs-554760/v1), 2021-06-11
Supplement: Supplementary file 1 [file d7f6c427b6b8e0010812432c.docx]

Supplemental table2

46 kinases that specific inhibitors are available

| gene symbol | gene name | drug |
| --- | --- | --- |
| CDK4 | Cyclin Dependent Kinase 4 | abemaciclib |
| CDK6 | Cyclin Dependent Kinase 6 | abemaciclib |
| BTK | Bruton Tyrosine Kinase | acalabrutinib |
| EGFR | Epidermal Growth Factor Receptor | afatinib |
| ERBB2 | Erb-B2 Receptor Tyrosine Kinase 2 | afatinib |
| ERBB4 | Erb-B2 Receptor Tyrosine Kinase 4 | afatinib |
| ALK | ALK Receptor Tyrosine Kinase | alectinib |
| MET | MET Proto-Oncogene, Receptor Tyrosine Kinase | cabozantinib |
| RET | Ret Proto-Oncogene | cabozantinib |
| TEK | TEK Receptor Tyrosine Kinase | cabozantinib |
| IGF1R | Insulin Like Growth Factor 1 Receptor | ceritinib |
| INSR | Insulin Receptor | ceritinib |
| ROS1 | ROS Proto-Oncogene 1, Receptor Tyrosine Kinase | crizotinib |
| BRAF | B-Raf Proto-Oncogene, Serine/Threonine Kinase | dabrafenib |
| NTRK1 | Neurotrophic Receptor Tyrosine Kinase 1 | entrectinib |
| NTRK2 | Neurotrophic Receptor Tyrosine Kinase 2 | entrectinib |
| NTRK3 | Neurotrophic Receptor Tyrosine Kinase 3 | entrectinib |
| MTOR | Mechanistic Target Of Rapamycin Kinase | everolimus |
| SYK | Spleen Associated Tyrosine Kinase | fostamatinib |
| FLT3 | Fms Related Tyrosine Kinase 3 | gilteritinib |
| AXL | AXL Receptor Tyrosine Kinase | gilteritinib |
| KIT | KIT Proto-Oncogene Receptor Tyrosine Kinase | imatinib |
| PRKCA | Protein Kinase C Alpha | midostaurin |
| PRKCB | Protein Kinase C Beta | midostaurin |
| PRKCG | Protein Kinase C Gamma | midostaurin |
| FGR | FGR Proto-Oncogene, Src Family Tyrosine Kinase | midostaurin |
| ROCK1 | Rho Associated Coiled-Coil Containing Protein Kinase 1 | netarsudil |
| ROCK2 | Rho Associated Coiled-Coil Containing Protein Kinase 2 | netarsudil |
| FLT1 | Fms Related Tyrosine Kinase 1 | nintedanib |
| KDR | Kinase Insert Domain Receptor | nintedanib |
| FLT4 | Fms Related Tyrosine Kinase 4 | nintedanib |
| FGFR1 | Fibroblast Growth Factor Receptor 1 | nintedanib |
| FGFR2 | Fibroblast Growth Factor Receptor 2 | nintedanib |
| FGFR3 | Fibroblast Growth Factor Receptor 3 | nintedanib |
| PDGFRA | Platelet Derived Growth Factor Receptor Alpha | nintedanib |
| PDGFRB | Platelet Derived Growth Factor Receptor Beta | nintedanib |
| CSF1R | Colony Stimulating Factor 1 Receptor | pexidartinib |
| ABL1 | ABL Proto-Oncogene 1, Non-Receptor Tyrosine Kinase | ponatinib |
| ABL2 | ABL Proto-Oncogene 2, Non-Receptor Tyrosine Kinase | ponatinib |
| SRC | SRC Proto-Oncogene, Non-Receptor Tyrosine Kinase | ponatinib |
| JAK1 | Janus Kinase 1 | ruxolitinib |
| JAK2 | Janus Kinase 2 | ruxolitinib |
| RAF1 | Raf-1 Proto-Oncogene, Serine/Threonine Kinase | sorafenib |
| JAK3 | Janus Kinase 3 | tofacitinib |
| MAP2K1 | Mitogen-Activated Protein Kinase Kinase 1 | trametinib |
| MAP2K2 | Mitogen-Activated Protein Kinase Kinase 2 | trametinib |
